# Supplementary material for: Asymmetric chromosome segregation in Xanthomonas citri ssp. citri
Source: PubMed Central journal article supplement (PMC3937727; doi:10.1002/mbo3.145), 2013-12-15
Supplement: mbo30003-0029-sd1.pdf [file mbo30003-0029-sd1.pdf]

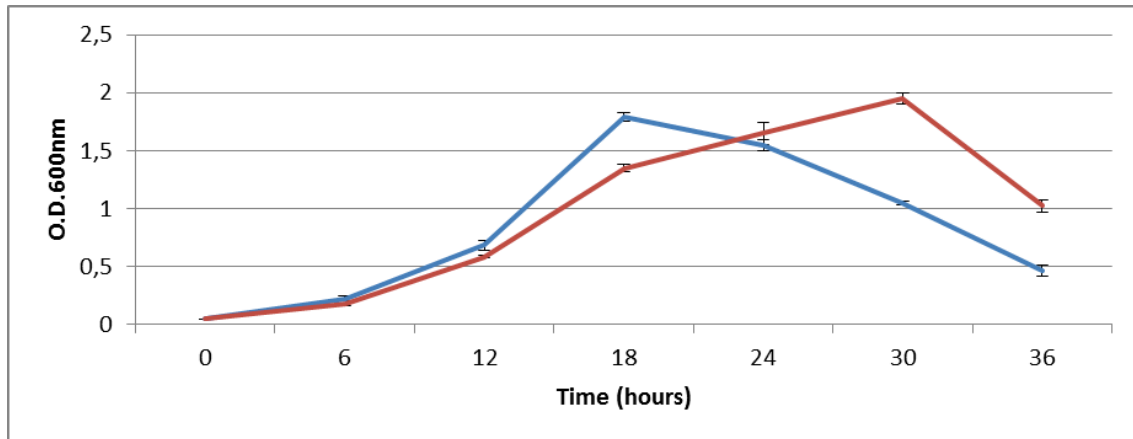

**Figure S1** Growth curve of the mutant *Xac parB*::pAPU2. Bacteria were cultivated for 36h in NYG-medium at 30 °C and 200 rpm. Each point in the graph corresponds to an average of optical densities (O.D.<sub>600 nm</sub>) calculated from three independent experiments; vertical bars indicate standard deviation values calculated for each average. Here we show the measurements done for mutant 3, however, mutants 1 and 2 exhibited similar growth patterns. Blue, wild-type *Xac*, red, *Xac parB*::pAPU2.
