# Supplementary material for: Asymmetric chromosome segregation in Xanthomonas citri ssp. citri
Source: PubMed Central journal article supplement (PMC3937727; doi:10.1002/mbo3.145), 2013-12-15
Supplement: mbo30003-0029-sd2.pdf [file mbo30003-0029-sd2.pdf]

**Table S1. Oligonucleotides.**

| <b>Name</b>   | <b>Sequence*</b>                              |
|---------------|-----------------------------------------------|
| PBS1479F      | 5'-TGAG <u>GATCC</u> ATGGAAAAGAGAAGATGGAAAAAG |
| PBS1479R      | 5'-ATTCTAGATCAAGCTTCAGGTTGACTTCCCCGCGG        |
| parBintF      | 5'-GATAGCTTGCGCCAGTTGC                        |
| parBintR      | 5'-CCTGTGGGGCCACCGGCGC                        |
| ParBF20070822 | 5'- ATGGATCCATGAACAAGCCGATCCCCGCAAAGAAG       |
| ParBR20080530 | 5'- ATGGATCCGCTACGCTGCATGCGCAGGC              |
| ParB20100309  | 5'- ATCTCGAGACCCAAGCTACGCTGCATGCGCAGGC        |

\* The restriction sites used for cloning are underlined
